# Supplementary material for: Effects of sphingolipids overload on red blood cell properties in Gaucher disease
Source: PubMed Central journal article supplement (PMC7520281; doi:10.1111/jcmm.15534), 2020-08-07
Supplement: JCMM-24-9726-s002.pdf [file JCMM-24-9726-s002.pdf]

**Table 4.** Summary of the concentrations measured in GD patients and controls as well as in our experience of adding exogenous lipids.

|                                                                   | Sphingolipid quantification in plasma (nM) |          |       |     | Sphingolipid quantification in RBCs (nM) |          |       |     |
|-------------------------------------------------------------------|--------------------------------------------|----------|-------|-----|------------------------------------------|----------|-------|-----|
|                                                                   | GL1                                        | Lyso-GL1 | S1P   | Sph | GL1                                      | Lyso-GL1 | S1P   | Sph |
| <b>Summary of the results :</b>                                   |                                            |          |       |     |                                          |          |       |     |
| Median in controls ( <i>obtained from Chipeaux et al., 2017</i> ) | 3844                                       | 1.6      | 1 609 | 6.9 | 82                                       | 5.2      | 1 274 | 4.0 |
| Maximum values measured in GD UT patient                          | 18021                                      | 217      | 7127  | 23  | 204                                      | 184      | 4071  | 21  |
| <b>Exogenous lipids added on control blood :</b>                  |                                            |          |       |     |                                          |          |       |     |
| Concentration to add to control samples                           | 14000                                      | 220      | 5500  | 16  |                                          |          |       |     |
| Concentration in RBCs at T0                                       |                                            |          |       |     | 74                                       | 5.4      | 960   | 3.9 |
| Concentration in RBCs (2 hours of incubation)                     |                                            |          |       |     | 78                                       | 107      | 4168  | 12  |
